# Supplementary material for: The Trypanosoma cruzi Satellite DNA OligoC-TesT and Trypanosoma cruzi Kinetoplast DNA OligoC-TesT for Diagnosis of Chagas Disease: A Multi-cohort Comparative Evaluation Study
Source: PubMed Central journal article supplement (PMC3879245; doi:10.1371/journal.pntd.0002633), 2014-01-02

General example

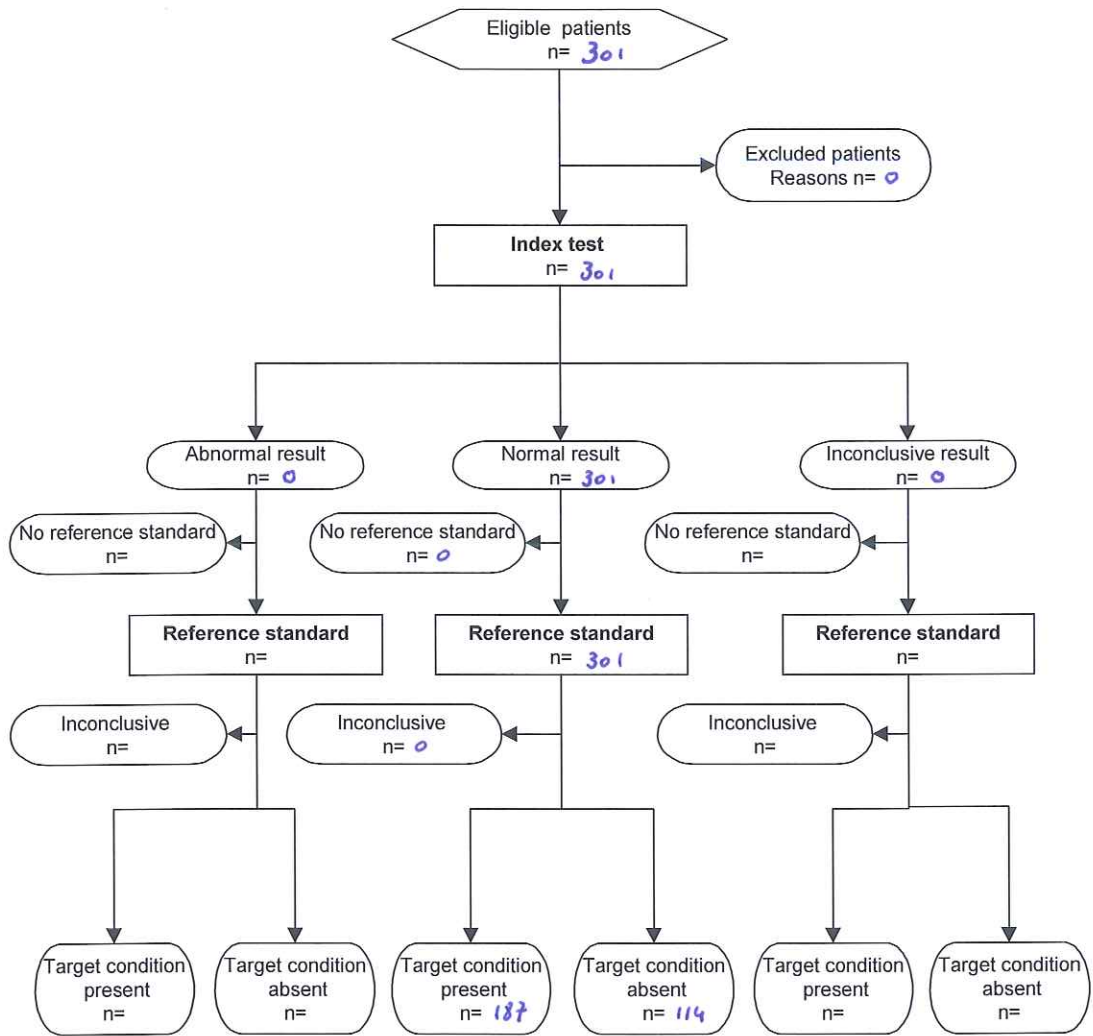

Supplement: pntd.0002633.s002.pdf [file pntd.0002633.s002.pdf]
